# Supplementary material for: Radiomics-Based Prediction of Collateral Status from CT Angiography of Patients Following a Large Vessel Occlusion Stroke
Source: MDPI journal article supplement (doi:10.3390/diagnostics14050485), 2024-02-23
Supplement: s1 [file s1]

**Supplementary Table 1.** List of first-order and texture-based features

| <b>First-order Features</b>                              |                                        |
|----------------------------------------------------------|----------------------------------------|
| 1                                                        | 10 <sup>th</sup> percentile            |
| 2                                                        | 90 <sup>th</sup> percentile            |
| 3                                                        | Energy                                 |
| 4                                                        | Entropy                                |
| 5                                                        | Interquartile Range                    |
| 6                                                        | Kurtosis                               |
| 7                                                        | Maximum                                |
| 8                                                        | Mean                                   |
| 9                                                        | Mean Absolute Deviation                |
| 10                                                       | Median                                 |
| 11                                                       | Minimum                                |
| 12                                                       | Range                                  |
| 13                                                       | Robust Mean Absolute Deviation         |
| 14                                                       | Root Mean Squared                      |
| 15                                                       | Skewness                               |
| 16                                                       | Total Energy                           |
| 17                                                       | Uniformity                             |
| 18                                                       | Variance                               |
| <b>Texture - Gray Level Cooccurrence Matrix Features</b> |                                        |
| 1                                                        | Autocorrelation                        |
| 2                                                        | Cluster Prominence                     |
| 3                                                        | Cluster Shade                          |
| 4                                                        | Cluster Tendency                       |
| 5                                                        | Contrast                               |
| 6                                                        | Correlation                            |
| 7                                                        | Difference Average                     |
| 8                                                        | Difference Entropy                     |
| 9                                                        | Difference Variance                    |
| 10                                                       | Informational Measure of Correlation 1 |
| 11                                                       | Informational Measure of Correlation 2 |
| 12                                                       | Inverse Difference                     |
| 13                                                       | Inverse Difference Moment              |
| 14                                                       | Inverse Difference Moment Normalized   |
| 15                                                       | Inverse Difference Normalized          |
| 16                                                       | Inverse Variance                       |
| 17                                                       | Joint Average                          |
| 18                                                       | Joint Energy                           |
| 19                                                       | Joint Entropy                          |
| 20                                                       | Maximal Correlation Coefficient        |

|                                                                   |                                      |
|-------------------------------------------------------------------|--------------------------------------|
| 21                                                                | Maximum Probability                  |
| 22                                                                | Sum Average                          |
| 23                                                                | Sum Entropy                          |
| 24                                                                | Sum of Squares                       |
| <b>Texture - Gray Level Size Zone Matrix Features</b>             |                                      |
| 1                                                                 | Gray Level Non-Uniformity            |
| 2                                                                 | Gray Level Non-Uniformity Normalized |
| 3                                                                 | Gray Level Variance                  |
| 4                                                                 | High Gray Level Zone Emphasis        |
| 5                                                                 | Large Area Emphasis                  |
| 6                                                                 | Large Area High Gray Level Emphasis  |
| 7                                                                 | Large Area Low Gray Level Emphasis   |
| 8                                                                 | Low Gray Level Zone Emphasis         |
| 9                                                                 | Size Zone Non-Uniformity             |
| 10                                                                | Size Zone Non-Uniformity Normalized  |
| 11                                                                | Small Area Emphasis                  |
| 12                                                                | Small Area High Gray Level Emphasis  |
| 13                                                                | Small Area Low Gray Level Emphasis   |
| 14                                                                | Zone Entropy                         |
| 15                                                                | Zone Percentage                      |
| 16                                                                | Zone Variance                        |
| <b>Texture - Gray Level Run Length Matrix Features</b>            |                                      |
| 1                                                                 | Gray Level Non-Uniformity            |
| 2                                                                 | Gray Level Non-Uniformity Normalized |
| 3                                                                 | Gray Level Variance                  |
| 4                                                                 | High Gray Level Run Emphasis         |
| 5                                                                 | Long Run Emphasis                    |
| 6                                                                 | Long Run High Gray Level Emphasis    |
| 7                                                                 | Long Run Low Gray Level Emphasis     |
| 8                                                                 | Low Gray Level Run Emphasis          |
| 9                                                                 | Run Entropy                          |
| 10                                                                | Run Length Non-Uniformity            |
| 11                                                                | Run Length Non-Uniformity Normalized |
| 12                                                                | Run Percentage                       |
| 13                                                                | Run Variance                         |
| 14                                                                | Short Run Emphasis                   |
| 15                                                                | Short Run High Gray Level Emphasis   |
| 16                                                                | Short Run Low Gray Level Emphasis    |
| <b>Texture - Neighboring Gray Tone Difference Matrix Features</b> |                                      |

|                                                        |                                           |
|--------------------------------------------------------|-------------------------------------------|
| 1                                                      | Busyness                                  |
| 2                                                      | Coarseness                                |
| 3                                                      | Complexity                                |
| 4                                                      | Contrast                                  |
| 5                                                      | Strength                                  |
| <b>Texture - Gray Level Dependence Matrix Features</b> |                                           |
| 1                                                      | Dependence Entropy                        |
| 2                                                      | Dependence Non-Uniformity                 |
| 3                                                      | Dependence Non-Uniformity Normalized      |
| 4                                                      | Dependence Variance                       |
| 5                                                      | Gray Level Non-Uniformity                 |
| 6                                                      | Gray Level Variance                       |
| 7                                                      | High Gray Level Emphasis                  |
| 8                                                      | Large Dependence Emphasis                 |
| 9                                                      | Large Dependence High Gray Level Emphasis |
| 10                                                     | Large Dependence Low Gray Level Emphasis  |
| 11                                                     | Low Gray Level Emphasis                   |
| 12                                                     | Small Dependence Emphasis                 |
| 13                                                     | Small Dependence High Gray Level Emphasis |
| 14                                                     | Small Dependence Low Gray Level Emphasis  |

A complete list of the first-order and texture features used in this study is described in van Griethuysen et al., 2017<sup>5</sup>, and exact feature definitions are described in Pyradiomics documentation<sup>6</sup>.

**Supplementary Table 2.** Machine-learning classifiers' hyperparameters and ranges

| ML classifier         | n Rounds <sup>a</sup> | Hyperparameter <sub>b</sub> | Lower bound | Upper bound        |
|-----------------------|-----------------------|-----------------------------|-------------|--------------------|
| ElNet <sup>7</sup>    | 100                   | n features <sup>c</sup>     | 2           | 30                 |
|                       |                       | alpha                       | 0           | 1                  |
| NBayes <sup>8</sup>   | 50                    | n features <sup>c</sup>     | 2           | 30                 |
| RF <sup>9</sup>       | 150                   | n features <sup>c</sup>     | 2           | 30                 |
|                       |                       | mtry                        | 2           | 40                 |
|                       |                       | maxnodes                    | 2           | 32768 <sup>d</sup> |
| SVM_rad <sup>10</sup> | 150                   | n features <sup>c</sup>     | 2           | 30                 |
|                       |                       | gamma                       | 0           | 0.5                |
|                       |                       | cost                        | 0.1         | 10                 |
| SVM_sig <sup>10</sup> | 200                   | n features <sup>c</sup>     | 2           | 30                 |
|                       |                       | gamma                       | 0           | 0.5                |
|                       |                       | coef0                       | 0           | 1                  |
|                       |                       | cost                        | 0.1         | 10                 |
| XGB <sup>11, 12</sup> | 200                   | n features <sup>c</sup>     | 2           | 30                 |
|                       |                       | eta                         | 0           | 1                  |
|                       |                       | gamma                       | 0           | 10                 |
|                       |                       | max_depth                   | 3           | 15                 |
|                       |                       | min_child_weight            | 0           | 20                 |
|                       |                       | subsample                   | 0.4         | 1                  |
|                       |                       | colsample_bytree            | 0.4         | 1                  |
|                       |                       | lambda                      | 0.5         | 1                  |

For each hyperparameter of each machine-learning classifier used in functional outcome prediction models, the number of optimization rounds performed, upper bounds, and lower bounds are described in this table. Machine-learning hyperparameter tuning was executed using the “rBayesianOptimization” package<sup>4</sup>.

<sup>a</sup> For each tuned hyperparameter, 50 rounds of tuning were performed, capped at a maximum of 200 rounds per model.

<sup>b</sup> Machine-learning references in column 1 also include parameter definitions.

<sup>c</sup> As described in the supplementary methods, the number of features was not tuned for some dimensionality reduction methods.

<sup>d</sup> The maximum possible number of nodes in a decision tree is equal to 2 to the power of the depth. With a depth of 15 in this work, the total maximum number of nodes was 32768.

## References

1. Haider SP, Mahajan A, Zeevi T, et al. **PET/CT radiomics signature of human papilloma virus association in oropharyngeal squamous cell carcinoma.** *Eur J Nucl Med Mol Imaging* 2020;
2. Haider SP, Zeevi T, Baumeister P, et al. **Potential Added Value of PET/CT Radiomics for Survival Prognostication beyond AJCC 8th Edition Staging in Oropharyngeal Squamous Cell Carcinoma.** *Cancers (Basel)* 2020;12:
3. Haider SP, Sharaf K, Zeevi T, et al. **Prediction of post-radiotherapy locoregional progression in HPV-associated oropharyngeal squamous cell carcinoma using machine-learning analysis of baseline PET/CT radiomics.** *Transl Oncol* 2020;14:100906
4. Yan Y. rBayesianOptimization: Bayesian Optimization of Hyperparameters. Version 1.1.0 ed; 2016
5. van Griethuysen JJM, Fedorov A, Parmar C, et al. **Computational Radiomics System to Decode the Radiographic Phenotype.** *Cancer Res* 2017;77:e104-e107
6. Pyradiomics-community. Pyradiomics Documentation Release 2.1.2. 2018
7. Friedman JH, Hastie T, Tibshirani R. **Regularization Paths for Generalized Linear Models via Coordinate Descent.** *2010* 2010;33:22
8. Majka M. naivebayes: High Performance Implementation of the Naive Bayes Algorithm in R. Version 0.9.6 ed; 2019
9. Liaw A, Wiener M. **Classification and Regression by randomForest.** *R News* 2002;2:18-22
10. Meyer D, Dimitriadou E, Hornik K, et al. e1071: Misc Functions of the Department of Statistics, Probability Theory Group (Formerly: E1071), TU Wien. Version 1.7-2 ed; 2019
11. Chen T, He T, Benesty M, et al. xgboost: Extreme Gradient Boosting. Version 0.90.0.2 ed; 2019
12. Chen T, Guestrin C. XGBoost: A Scalable Tree Boosting System. *arXiv e-prints*; 2016
